# Supplementary material
Source: PubMed Central journal article supplement (PMC7090851)
Supplement: 12275_2018_7504_MOESM1_ESM.pdf [file 12275_2018_7504_MOESM1_ESM.pdf]

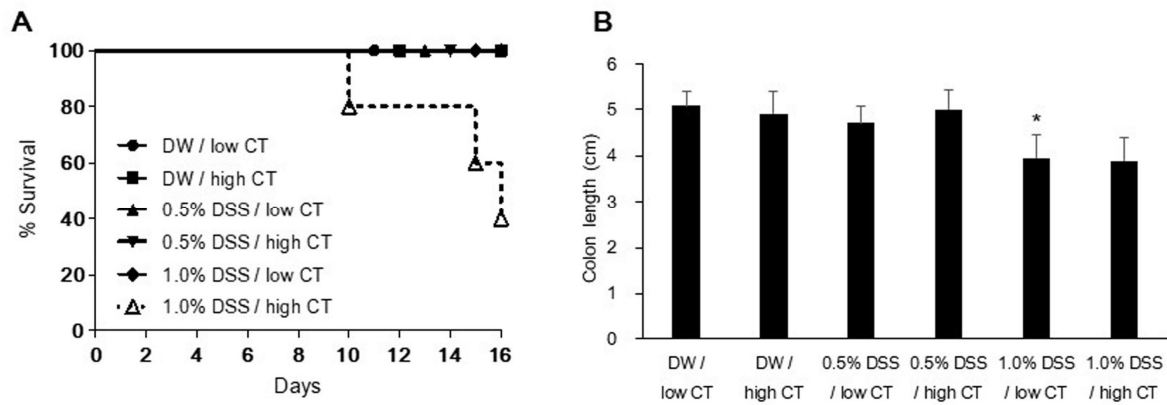

**Supplementary data Fig. S1. Mice survival and colon length analyses.** Thirty mice were divided into six groups ( $n = 5$  mice per group) and pretreated with 0.5% or 1% dextran sulfate sodium (DSS), or normal drinking water (DW) for 1 week, and subsequently inoculated with  $1.6 \times 10^8$  (low) or  $1.6 \times 10^9$  (high) CFU of *C. rodentium* (CT). (A) Mice survival was monitored daily for 16 days. All mice, except 3 mice belonging to the 1% DSS and high CT group, were alive until the end of the experiment. (B) Length of the colon was measured after the experiment. The data are expressed as the mean  $\pm$  SD ( $*P < 0.05$ , compared to other groups except 1% DSS and high CT group).

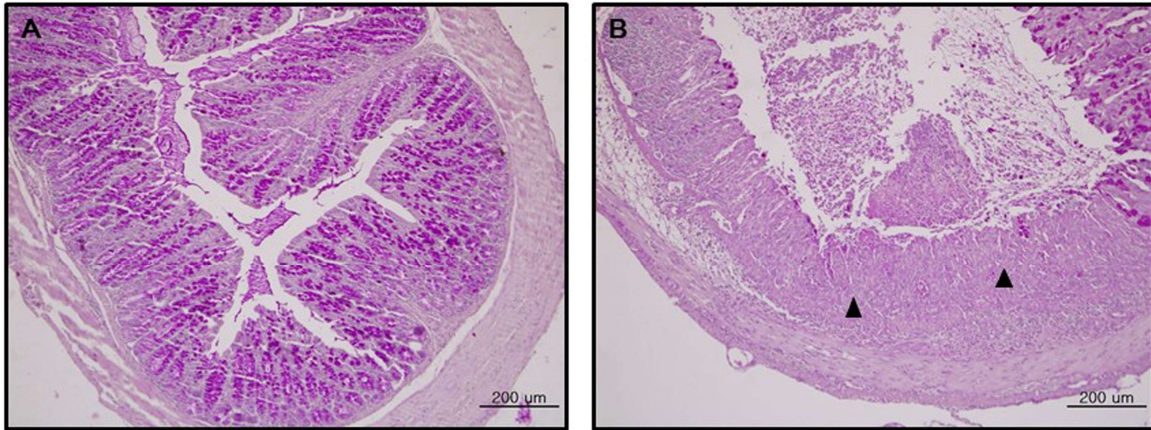

**Supplementary data Fig. S2. Representative images of histopathological lesions in the colon of control (A) and DSS-CT (B) groups.** Depletion of goblet cells (arrowheads) was observed in the DSS-CT group (Periodic acid–Schiff stain). Scale bar = 200 μm
